# Supplementary material for: Calcium Phosphate Particles Coated with Humic Substances: A Potential Plant Biostimulant from Circular Economy
Source: MDPI journal article supplement (doi:10.3390/molecules26092810), 2021-05-10
Supplement: s1 [file s1]

Supplementary materials

# Calcium Phosphate Particles Coated with Humic Acids: A Potent Plant Biostimulant from Circular Economy

Alessio Adamiano <sup>1</sup>, Guido Fellet <sup>2</sup>, Marco Vuerich <sup>2</sup>, Dora Scarpin <sup>2</sup>, Francesca Carella <sup>1</sup>, Clara Piccirillo <sup>3</sup>, Jong-Rok Jeon <sup>4</sup>, Alessia Pizzutti <sup>5,2</sup>, Luca Marchiol <sup>2</sup>, Michele Iafisco <sup>1</sup>

<sup>1</sup> Institute of Science and Technology for Ceramics (ISTEC), National Research Council (CNR), Via Granarolo 64, 48018 Faenza (RA), Italy;

alessio.adamiano@istec.cnr.it; francesca.carella@istec.cnr.it; michele.iafisco@istec.cnr.it;

<sup>2</sup> Department of AgriFood, Animal and Environmental Sciences, University of Udine, via delle Scienze 206, 33100 Udine, Italy;

guido.fellet@uniud.it; vuerich.marco@spes.uniud.it; scarpin.dora@spes.uniud.it; luca.marchiol@uniud.it

<sup>3</sup> Institute of Nanotechnology (NANOTEC), National Research Council (CNR), Campus Ecotekne, Via Monteroni, 73100 Lecce, Italy; clara.piccirillo@nanaotec.cnr.it;

<sup>4</sup> Department of Agricultural Chemistry and Food Science & Technology and IALS, Gyeongsang National University, Jinju 52828, Republic of Korea; jrjeon@gnu.ac.kr;

<sup>5</sup> Department of Life Sciences, University of Trieste, Via Licio Giorgieri 10, 34127, Trieste, Italy  
alessia.pizzutti@phd.units.it

**Table S1.** Two-way ANOVA applied on morphological and biochemical variables measured on *Diplotaxis tenuifolia*. Data are mean  $\pm$  standard deviation (n = 4). Different symbols indicate statistically significance of the analyzed factors (\*\*\*,  $p \leq 0.001$ ; \*\*,  $p \leq 0.01$ ; \*,  $p \leq 0.05$ ).

| Parameter    | Treatment       | Df    | F-value | p-value                |
|--------------|-----------------|-------|---------|------------------------|
| Roots DW     | CaP             | 1,14  | 5.5     | 0.034 *                |
| Shoot DW     | HS              | 1,12  | 0.00    | 0.985                  |
|              | CaP             | 1,12  | 0.05    | 0.832                  |
|              | CaP $\times$ HS | 1,12  | 8.49    | 0.013 *                |
| log(Ca root) | CaP             | 1, 14 | 274     | $2 \cdot 10^{-10}$ *** |
| log(P root)  | CaP             | 1,14  | 210     | $8 \cdot 10^{-10}$ *** |
| K root       | HS              | 1,12  | 11.08   | 0.006 ***              |
|              | CaP             | 1,12  | 1.16    | 0.302                  |
|              | CaP $\times$ HS | 1,12  | 6.29    | 0.027 *                |
| Mg root      | HS              | 1,13  | 6.44    | 0.025 *                |
|              | CaP             | 1,13  | 19.29   | $7 \cdot 10^{-4}$ ***  |
| Ca leaf      | CaP             | 1,12  | 4.96    | 0.046 *                |
|              | HS              | 1,12  | 7.11    | 0.021 *                |
|              | CaP $\times$ HS | 1,12  | 7.20    | 0.020 *                |
| P leaf       | HS              | 1,11  | 28.1    | $3 \cdot 10^{-4}$ ***  |
|              | CaP             | 1,11  | 54.3    | $1 \cdot 10^{-5}$ ***  |
|              | CaP $\times$ HS | 1,11  | 8.5     | 0.014 *                |
| K leaf       | HS              | 1,12  | 7.75    | 0.017 *                |
|              | CaP             | 1,12  | 0.22    | 0.646                  |
|              | CaP $\times$ HS | 1,12  | 14.47   | 0.002 **               |
| Mg leaf      | HS              | 1,12  | 0.17    | 0.689                  |
|              | CaP             | 1,12  | 1.60    | 0.230                  |
|              | CaP $\times$ HS | 1,12  | 5.51    | 0.037 *                |

**Table S2.** Two-way ANOVA applied on morphological and biochemical variables measured on *Valerianella locusta*. Data are mean  $\pm$  standard deviation (n = 4). Different symbols indicate statistically significance of the analyzed factors (\*\*\*,  $p \leq 0.001$ ; \*\*,  $p \leq 0.01$ ; \*,  $p \leq 0.05$ ).

| Parameter    | Treatment       | Df    | F-value | p-value                |
|--------------|-----------------|-------|---------|------------------------|
| Root length  | HS              | 1,14  | 9.37    | 0.009 **               |
| Shoot DW     | HS              | 1,14  | 14.2    | 0.002 **               |
| log(Ca root) | CaP             | 1, 13 | 3487    | $2 \cdot 10^{-16}$ *** |
| log(P root)  | HS              | 1,11  | 5.29    | 0.042 *                |
|              | CaP             | 1,11  | 9299.74 | $2 \cdot 10^{-16}$ *** |
|              | CaP $\times$ HS | 1,11  | 8.29    | 0.015 *                |
| K root       | HS              | 1,12  | 2.57    | 0.135                  |
|              | CaP             | 1,12  | 0.24    | 0.631                  |
|              | CaP $\times$ HS | 1,12  | 10.96   | 0.006 **               |
| Mg root      | HS              | 1, 13 | 9.96    | 0.008 **               |
| Ca leaf      | HS              | 1,13  | 12.5    | 0.004 **               |
|              | CaP             | 1,13  | 12.8    | 0.003 **               |
| P leaf       | CaP             | 1,12  | 28.8    | $2 \cdot 10^{-4}$ ***  |
|              | HS              | 1,12  | 16.6    | 0.002 **               |
|              | CaP $\times$ HS | 1,12  | 18.6    | 0.001 **               |
| K leaf       | CaP             | 1,13  | 7.64    | 0.016 *                |

**Table S3.** Germination percentage, root specific weight, and total seedling dry weight of *Diplotaxis tenuifolia*. Data are mean  $\pm$  standard deviation (n = 4). Different letters indicate statistically significant difference between treatments at Tukey's post-hoc test ( $p \leq 0.05$ ).

| Treatments | Germination (%) | Root specific weight (mg mm <sup>-1</sup> ) | Total DW (mg plant <sup>-1</sup> ) |
|------------|-----------------|---------------------------------------------|------------------------------------|
| Ctrl       | 54 $\pm$ 8.33 a | 0.077 $\pm$ 0.02 a                          | 26.1 $\pm$ 2.12 a                  |
| HS         | 58 $\pm$ 2.31 a | 0.079 $\pm$ 0.03 a                          | 28.6 $\pm$ 3.99 a                  |
| CaP        | 59 $\pm$ 5.03 a | 0.135 $\pm$ 0.04 a                          | 32.6 $\pm$ 5.28 a                  |
| CaP-HS     | 56 $\pm$ 10.3 a | 0.113 $\pm$ 0.05 a                          | 27.5 $\pm$ 4.33 a                  |

**Table S4.** Germination percentage, root specific weight, and total seedling dry weight of *Valerianella locusta*. Data are mean  $\pm$  standard deviation (n = 4). Different letters indicate statistically significant difference between treatments at Tukey's post-hoc test ( $p \leq 0.05$ ).

| Treatments | Germination (%) | Root specific weight (mg mm <sup>-1</sup> ) | Total DW (mg plant <sup>-1</sup> ) |
|------------|-----------------|---------------------------------------------|------------------------------------|
| Ctrl       | 44 $\pm$ 4.79 a | 0.140 $\pm$ 0.04 a                          | 21.8 $\pm$ 2.94 a                  |
| HS         | 53 $\pm$ 2.89 a | 0.125 $\pm$ 0.02 a                          | 24.7 $\pm$ 0.84 a                  |
| CaP        | 51 $\pm$ 4.78 a | 0.152 $\pm$ 0.03 a                          | 22.4 $\pm$ 2.41 a                  |
| CaP-HS     | 50 $\pm$ 7.07 a | 0.143 $\pm$ 0.02 a                          | 25.4 $\pm$ 0.51 a                  |

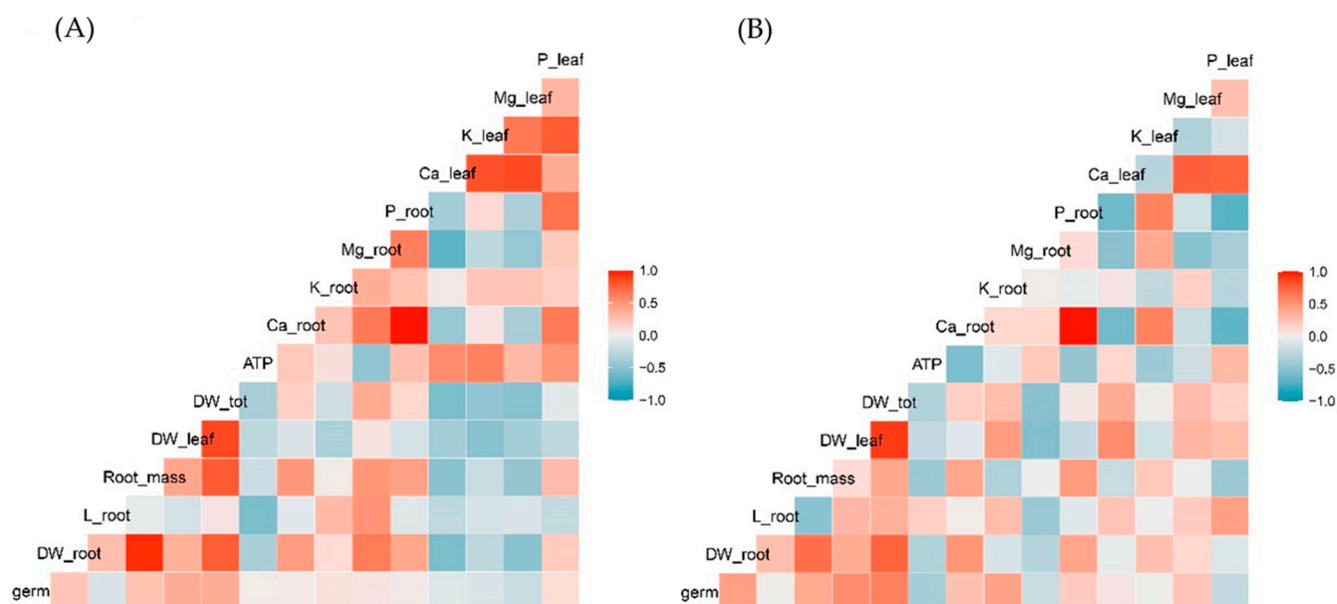

**Figure S1.** Correlation plot performed on global data set comparing all the considered variables measured for for *Diplotaxis tenuifolia* (A) and *Valerianella locusta* (B). Chromatic palet on the left indicates the correlation degree.

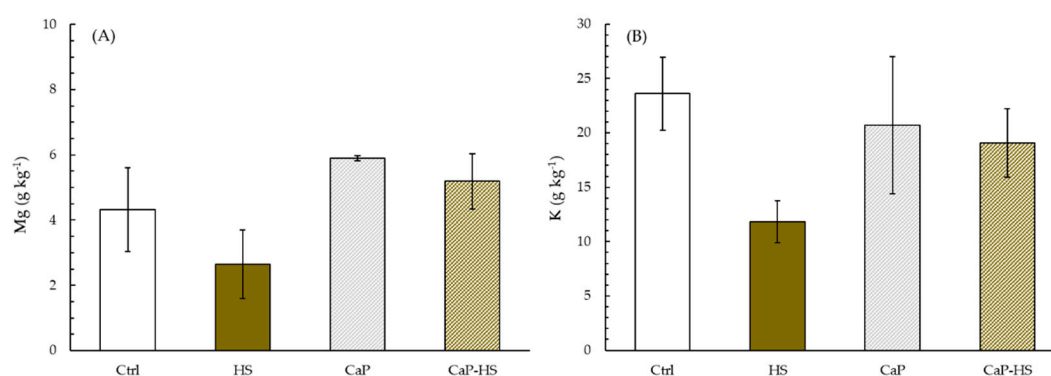

**Figure S2.** Concentration of Mg (A) and K (B) in roots of *Diplotaxis tenuifolia*. Data are mean  $\pm$  standard deviation ( $n = 4$ ). When the interaction between experimental factors (CaP  $\times$  HS) was significant at ANOVA, different letters were used to indicate statistically significant differences between treatments at Tukey's *post-hoc* test ( $p \leq 0.05$ ).

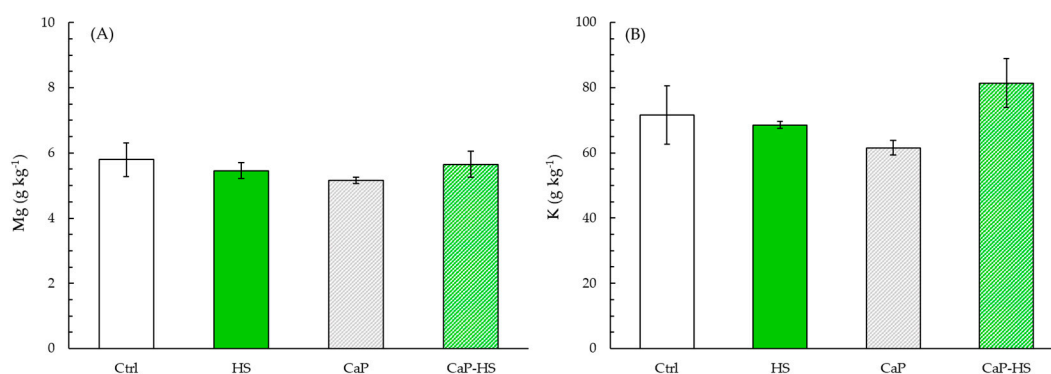

**Figure S3.** Concentration of Mg (A) and K (B) in leaves of *Diplotaxis tenuifolia*. Data are mean  $\pm$  standard deviation ( $n = 4$ ). When the interaction between experimental factors (CaP  $\times$  HS) was significant at ANOVA, different letters were used to indicate statistically significant differences between treatments at Tukey's *post-hoc* test ( $p \leq 0.05$ ).

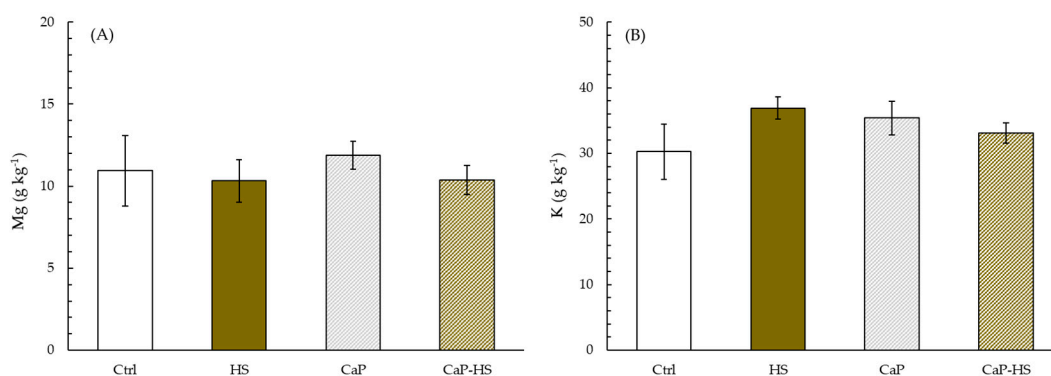

**Figure S4.** Concentration of Mg (A) and K (B) in roots of *Valerianella locusta*. Data are mean  $\pm$  standard deviation ( $n = 4$ ). When the interaction between experimental factors (CaP  $\times$  HS) was significant at ANOVA, different letters were used to indicate statistically significant differences between treatments at Tukey's *post-hoc* test ( $p \leq 0.05$ ).

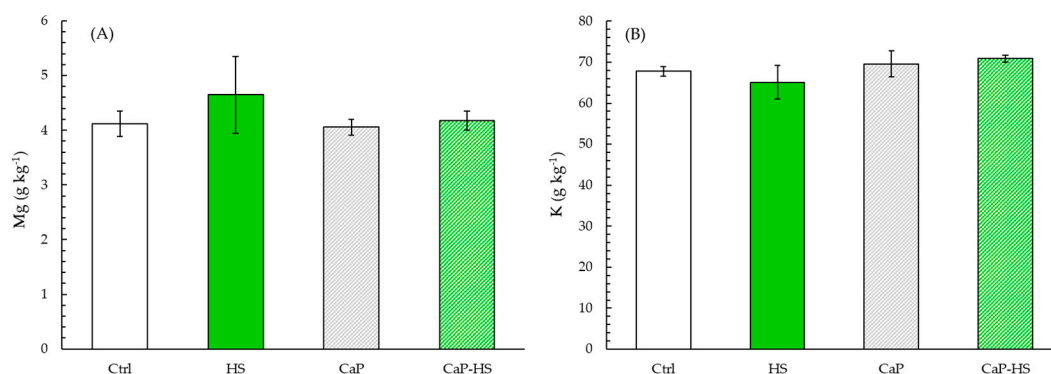

**Figure S5.** Concentration of Mg (A) and K (B) in leaves of *Valerianella locusta*. Data are mean  $\pm$  standard deviation (n=4). When the interaction between experimental factors (CaP  $\times$  HS) was significant at ANOVA, different letters were used to indicate statistically significant differences between treatments at Tukey's *post-hoc* test ( $p \leq 0.05$ ).

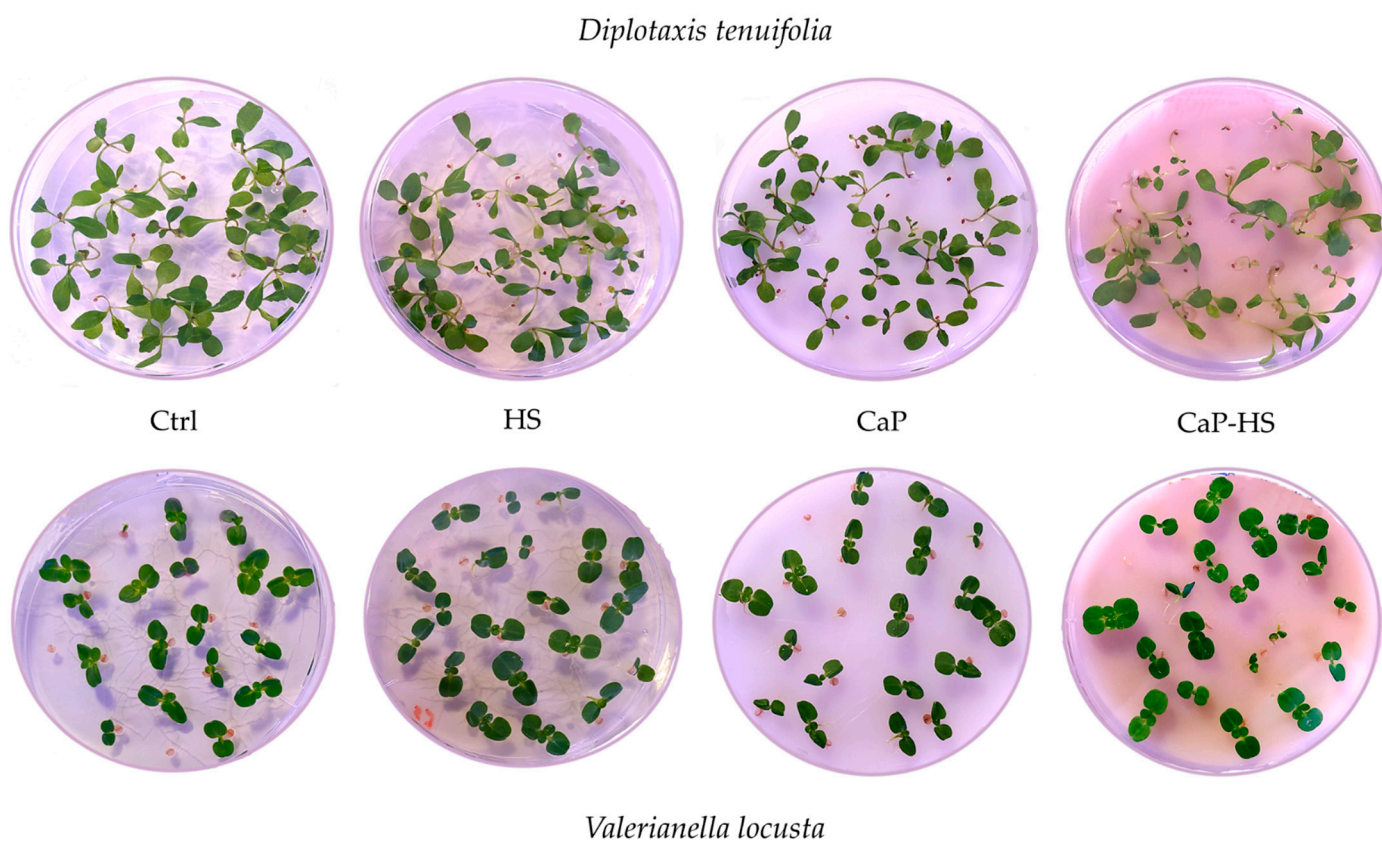

**Figure S6** Plantlets of *Diplotaxis tenuifolia* and *Valerianella locusta* in Petri dishes 20 day after sowing.
